# Supplementary material for: Evaluation of the association between the conjoined tendon-preserving posterior approach in total hip arthroplasty and early postoperative functional recovery: a retrospective cross-sectional study.
Source: Research Square preprint supplement (doi:10.21203/rs.3.rs-4511404/v1), 2024-07-12
Supplement: Supplementary file 1 [file f94809ae22e5fcfa27af0baf.docx]

| **Table 1.** Demographic data of study patients | | | | |
| --- | --- | --- | --- | --- |
|  | PL approach (n=32) | P-PL approach (n=34) | CPP approach (n=25) | p-value |
| Sex # | Male: 7; Female: 25 | Male: 5; Female: 29 | Male: 0; Female: 25 | **0.011** |
| Mean age, years (SD; range) $ | 64.4 (13.3; 59.6–69.2) | 68.9 (7.8; 66.1–71.6) | 64.2 (9.8; 60.2–68.3) | 0.947 †, 0.168 ††, 0.283 ††† |
| Mean height, cm (SD; range) $ | 158.1 (8.8; 154.9–161.3) | 155.6 (8.2; 152.7–158.4) | 156.1 (5.5; 153.8–158.4) | 0.744 †, 0.913 ††, 0.532 ††† |
| Mean weight, kg (SD; range) $ | 58.1 (9.0; 54.8–61.3) | 56.4 (11.1; 52.5–60.3) | 54.2 (6.9; 51.3–57.0) | 0.213 †, 0.959 ††, 0.605 ††† |
| Causative disease # | OA: 30; ONFH: 2; RDC: 0 | OA: 33; ONFH: 0; RDC: 1 | OA: 25; ONFH: 0; RDC: 0 | 0.184 |
| Bilateral THA at one- or two-stage # | 10 | 9 | 11 | 0.362 |
| Mean operation time, min (SD; range) $ | 87.3 (22.6; 79.8–96.1) | 78.5 (16.7; 72.7–84.3) | 90.3 (15.5; 83.9–96.7) | 0.594 †, **0.005 ††**, **0.010** ††† |
| Mean intraoperative blood loss, cc  (SD; range) $ | 396.1 (244.1; 308.1–484.1) | 318.6 (196.1; 250.2–387.0) | 336.4 (94.7; 297.3–375.5) | 0.213 †, 0.959 ††, 0.605 ††† |
| The frequency of complications # | 0 | 1 | 2 | 0.414 |
| $ Steel-Dwass's multiple comparison test, # chi-squared test, † CPP vs PL, †† CPP vs P-PL, ††† PL vs P-PL | | | | |
| Boldface numbers indicate significant differences. | | | | |
| PL, posterolateral; P-PL, piriformis muscle-sparing posterolateral; CPP, conjoined tendon-preserving posterior; THA, total hip arthroplasty; OA, osteoarthritis; ONFH, osteonecrosis of the femoral head; RDC, rapidly destructive coxarthropathy. | | | | |

| **Table 2.** Preoperative mHHS and JOA hip score as baseline data | | | | |
| --- | --- | --- | --- | --- |
|  | PL approach | P-PL approach | CPP approach | p-value |
| mHHS |  |  |  |  |
| Pain, mean (SD; range) | 17.2 (10.8; 13.3–21.1) | 13.8 (9.9; 10.4–17.3) | 12.4 (12.0; 7.4–17.4) | 0.187 †, 0.761 ††, 0.299 ††† |
| Function: Gait, mean (SD; range) | 22.1 (6.0; 20.0–24.3) | 19.9 (6.5; 17.6–22.1) | 23.6 (5.7; 21.3–26.0) | 0.547 †, 0.006 ††, 0.372 ††† |
| Functional activities, mean (SD; range) | 9.3 (2.4; 8.4–10.1) | 9.4 (1.3; 9.0–9.9) | 9.0 (1.7; 8.2–9.7) | 0.829 †, 0.603 ††, 0.983 ††† |
| Total score, mean (SD; range) | 53.4 (16.0; 47.6–59.2) | 47.4 (14.6; 42.3–52.5) | 49.5 (16.6; 42.6–56.4) | 0.670 †, 0.804 ††, 0.351 ††† |
|  |  |  |  |  |
| JOA hip score |  |  |  |  |
| Pain, mean (SD; range) | 17.2 (9.8; 0.0–35.0) | 13.7 (9.5; 0.0–35.0) | 11.8 (10.7; 0.0–35.0) | 0.126 †, 0.732 ††, 0.223 ††† |
| ROM, mean (SD; range) | 13.6 (3.6; 5.0–20.0) | 14.4 (5.0; 3.0–20.0) | 14.8 (3.2; 8.0–20.0) | 0.432 †, 0.927 ††, 0.377 ††† |
| Ability to walk, mean (SD; range) | 10.7 (4.8; 1.0–18.0) | 10.6 (4.7; 5.0–18.0) | 12.3 (4.3; 5.0–20.0) | 0.470 †, 0.390 ††, 0.999 ††† |
| ADL, mean (SD; range) | 13.1 (3.1; 6.0–20.0) | 12.7 (2.6; 8.0–16.0) | 11.3 (2.8; 6.0–16.0) | 0.095 †, 0.172 ††, 0.842 ††† |
| Total score, mean (SD; range) | 54.6 (14.5; 30.0–81.0) | 51.4 (15.4; 21.0–83.0) | 50.1 (15.6; 24.0–82.0) | 0.634 †, 0.949 ††, 0.801 ††† |
| Steel-Dwass's multiple comparison test, † CPP vs PL, †† CPP vs P-PL, ††† PL vs P-PL | | | | |
| Boldface numbers indicate significant differences. | | | | |
| PL, posterolateral; P-PL, piriformis muscle-sparing posterolateral; CPP, conjoined tendon-preserving posterior; mHHS: modified Harris Hip Score; JOA: Japanese Orthopaedic Association; ROM, range of motion; ADL, activities of daily life | | | | |

| **Table 3.** mHHS and JOA hip score in the 3-month postoperative period | | | | |
| --- | --- | --- | --- | --- |
|  | PL approach | P-PL approach | CPP approach | p-value |
| mHHS |  |  |  |  |
| Pain, mean (SD; range) | 41.8 (5.3; 39.8–43.7) | 41.8 (5.2; 39.9–43.6) | 44.0 (0.0; 44.0–44.0) | **0.022** †, **0.016** ††, 0.994 ††† |
| Function: Gait, mean (SD; range) | 28.8 (6.0; 26.7–31.0) | 30.5 (4.3; 29.0–32.0) | 32.9 (0.6; 32.6–33.1) | **<0.001** †, **0.006** ††, 0.514 ††† |
| Functional activities, mean (SD; range) | 11.8 (2.4; 11.0–12.7) | 10.8 (2.5; 9.9–11.7) | 13.2 (1.5; 12.6–13.8) | **0.037** †, **< 0.001** ††, 0.198 ††† |
| Total score, mean (SD; range) | 90.6 (11.8; 86.4–94.9) | 91.4 (11.4; 87.4–95.3) | 99.1 (2.1; 98.2–99.9) | **<0.001** †, **< 0.001** ††, 0.605 ††† |
|  |  |  |  |  |
| JOA hip score |  |  |  |  |
| Pain, mean (SD; range) | 37.8 (4.6; 20.0–40.0) | 37.9 (4.3; 20.0–40.0) | 40.0 (0.0; 40.0–40.0) | **0.022** †, **0.016** ††, 0.999 ††† |
| ROM, mean (SD; range) | 17.9 (2.3; 9.0–20.0) | 17.8 (3.0; 8.0–20.0) | 18.8 (1.8; 15.0–20.0) | 0.101 †, 0.261 ††, 0.776 ††† |
| Ability to walk, mean (SD; range) | 15.8 (4.2; 5.0–20.0) | 17.0 (4.1; 10.0–20.0) | 19.7 (1.1; 15.0–20.0) | **< 0.001** †, **0.009** ††, 0.369 ††† |
| ADL, mean (SD; range) | 17.9 (2.4; 12.0–20.0) | 17.0 (2.7; 8.0–20.0) | 19.4 (1.2; 16.0–20.0) | **0.017** †, **< 0.001** ††, 0.359 ††† |
| Total score, mean (SD; range) | 89.4 (9.4; 53.0–100.0) | 21.0 (13.5; 57.0–100.0) | 25.2 (13.7; 91.0–100.0) | **< 0.001** †, **< 0.001** ††, 0.949 ††† |
| Steel-Dwass's multiple comparison test, † CPP vs PL, †† CPP vs P-PL, ††† PL vs P-PL | | | | |
| Boldface numbers indicate significant differences. | | | | |
| PL, posterolateral; P-PL, piriformis muscle-sparing posterolateral; CPP, conjoined tendon-preserving posterior; mHHS: modified Harris Hip Score; JOA: Japanese Orthopaedic Association; ROM, range of motion; ADL, activities of daily life | | | | |

| **Table 4.** mHHS and JOA hip score in the 6-month postoperative period | | | | |
| --- | --- | --- | --- | --- |
|  | PL approach | P-PL approach | CPP approach | p-value |
| mHHS |  |  |  |  |
| Pain, mean (SD; range) | 42.1 (5.4; 40.2–44.1) | 43.5 (1.3; 43.1–44.0) | 44.0 (0.0; 44.0–44.0) | 0.105 †, 0.189 ††, 0.836 ††† |
| Function: Gait, mean (SD; range) | 30.5 (4.9; 28.8–32.3) | 31.9 (3.3; 30.7–33.1) | 32.9 (0.6; 32.6–33.1) | **0.008** †, 0.181 ††, 0.246 ††† |
| Functional activities, mean (SD; range) | 11.7 (2.6; 10.8–12.7) | 11.6 (2.1; 10.9–12.4) | 13.0 (1.4; 12.4–13.5) | 0.227 †, **0.037** ††, 0.947 ††† |
| Total score, mean (SD; range) | 92.8 (11.3; 88.7–96.9) | 95.8 (6.0; 93.7–97.9) | 98.8 (1.8; 98.1–99.6) | **0.027** †, **0.024** ††, 0.877 ††† |
|  |  |  |  |  |
| JOA hip score |  |  |  |  |
| Pain, mean (SD; range) | 38.4 (4.3; 20.0–40.0) | 39.4 (1.6; 20.0–40.0) | 40.0 (0.0; 40.0–40.0) | 0.105 †, 0.189 ††, 0.836 ††† |
| ROM, mean (SD; range) | 18.6 (2.0; 13.0–20.0) | 18.6 (1.9; 13.0–20.0) | 19.4 (1.3; 15.0–20.0) | **0.032** †, 0.096 ††, 0.912 ††† |
| Ability to walk, mean (SD; range) | 17.6 (4.2; 5.0–20.0) | 18.8 (3.4; 5.0–20.0) | 19.9 (0.4; 18.0–20.0) | **0.001** †, 0.984 ††, **0.047** ††† |
| ADL, mean (SD; range) | 18.0 (2.4; 10.0–20.0) | 17.8 (2.6; 8.0–20.0) | 19.3 (1.5; 16.0–20.0) | **0.034** †, **0.025** ††, 0.466 ††† |
| Total score, mean (SD; range) | 92.6 (9.6; 56.0–100.0) | 94.6 (6.6; 65.0–100.0) | 98.6 (2.4; 93.0–100.0) | **< 0.001** †, **0.002** ††, 0.109 ††† |
| Steel-Dwass's multiple comparison test, † CPP vs PL, †† CPP vs P-PL, ††† PL vs P-PL | | | | |
| Boldface numbers indicate significant differences. | | | | |
| PL, posterolateral; P-PL, piriformis muscle-sparing posterolateral; CPP, conjoined tendon-preserving posterior; mHHS: modified Harris Hip Score; JOA: Japanese Orthopaedic Association; ROM, range of motion; ADL, activities of daily life | | | | |

| Table 5. Reliability of the limping after THA | | | |
| --- | --- | --- | --- |
| Reliability of measurements of the limping after THA (95% CI) | ICC | 95% CI | p value |
| Intra-measurer ICC (1, 1) | 0.750939 | 0.573612 to 0.861032 | < 0.001 |
| Intra-measurer ICC (2, 1) | 0.816497 | 0.677241 to 0.899278 | < 0.001 |
| All p-values have significant differences. | | | |
| CI, confidence interval; ICC, intra- and inter-class correlation coefficients; THA, total hip arthroplasty. | | | |
